# Supplementary material for: Transcriptome-Based Discovery of Fusarium graminearum Stress Responses to FgHV1 Infection
Source: MDPI journal article supplement (doi:10.3390/ijms17111922), 2016-11-17
Supplement: s1 [file s1]

# Supplementary Materials: Transcriptome-Based Discovery of *Fusarium graminearum* Stress Responses to FgHV1 Infection

Shuangchao Wang, Jingze Zhang, Pengfei Li, Dewen Qiu and Lihua Guo

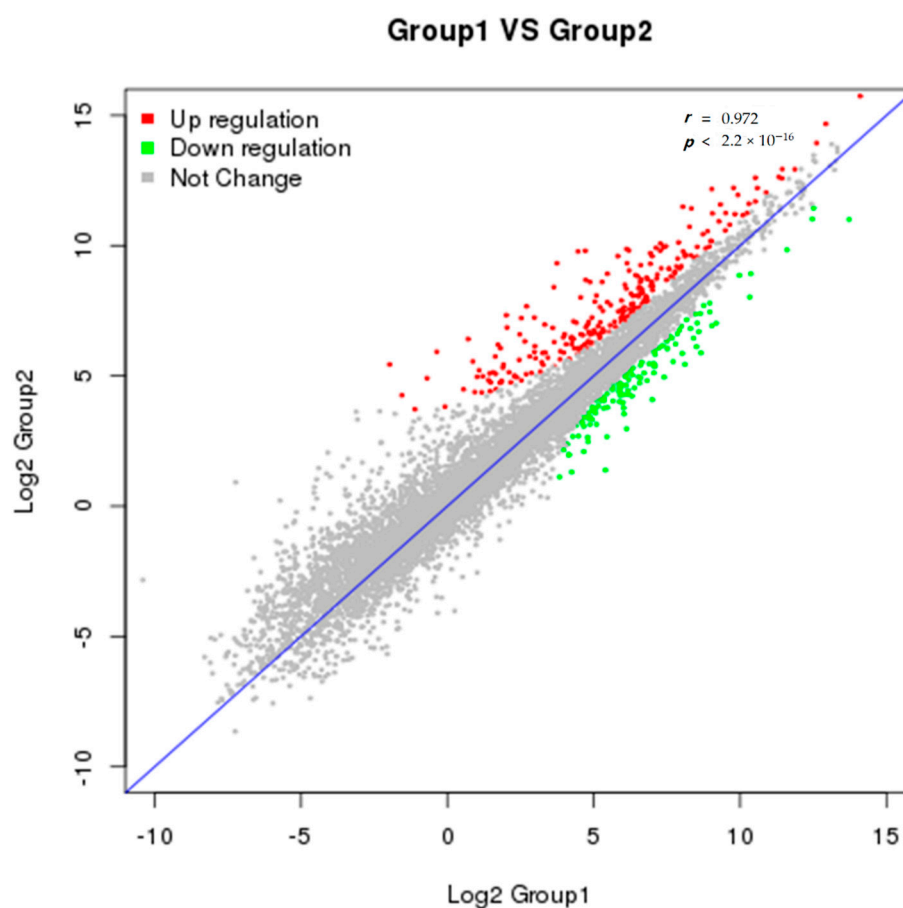

**Figure S1.** Correlation of the RPKM distribution between two groups. The red (Up) and green (down) dots indicate genes showing significant differences ( $FDR \leq 0.05$ , at least a two-fold difference), and the gray dots indicate genes not showing significant differences. Group 1: virus-infected samples; Group 2: virus-free samples. Pearson's correlation coefficients between the two groups are presented.

**Table S4.** List of primers used for qRT-PCR designed by Beacon Designer V8.12 with default parameters for SYBR Green design.

| Primer       | Sequence (5'-3')       |
|--------------|------------------------|
| FGSG_00226-F | GGTGCTCTTTGCGTAACAT    |
| FGSG_00226-R | GGTGGCGACAATTTGAGA     |
| FGSG_02168-F | AGACGGAAGAGCAATATGT    |
| FGSG_02168-R | CCAATGACGTTCCAGAGA     |
| FGSG_08700-F | CAAGGGAAACAAATACCA     |
| FGSG_08700-R | TATAGAAGCGATGTAAGGA    |
| FGSG_01151-F | GATACACAGGAGAGGATG     |
| FGSG_01151-R | TCATAAGAGACTGAATAGCA   |
| FGSG_05554-F | CGACCTATGCTCATCTTC     |
| FGSG_05554-R | TTACTGCTTGACAATCTTCT   |
| FGSG_03046-F | GACTGAATATGTCACCAA     |
| FGSG_03046-R | GCTTCCACTTGTACTTAG     |
| FGSG_03385-F | GAACTCAAGGATGGTCTC     |
| FGSG_03385-R | CTATTCAATAACAATGCGATGA |
| FGSG_10543-F | TTCTTGTCTTCACCTCTT     |
| FGSG_10543-R | TAGCACTTCTCGTATTGT     |
| FGSG_07673-F | TGTATCATCTAGTGGAAT     |
| FGSG_07673-R | ATATCATTGGCAAGTAAG     |
| FGSG_07386-F | CAGGTGTAGAAGATGGAG     |
| FGSG_07386-R | CACTACCACTACTGTCTC     |
| FGSG_09530-F | ATGCGCGAGATTGTTAC      |
| FGSG_09530-F | AGAGATGGTCTGCCAGAA     |
